# Supplementary material for: Sch9 regulates intracellular protein ubiquitination by controlling stress responses
Source: PubMed Central journal article supplement — Redox Biol. 2015 Jun 9;5:290–300. doi: 10.1016/j.redox.2015.06.002 (PMC4477112; doi:10.1016/j.redox.2015.06.002), 2015-06-09
Supplement: mmc1.pdf [file mmc1.pdf]

Figure S1

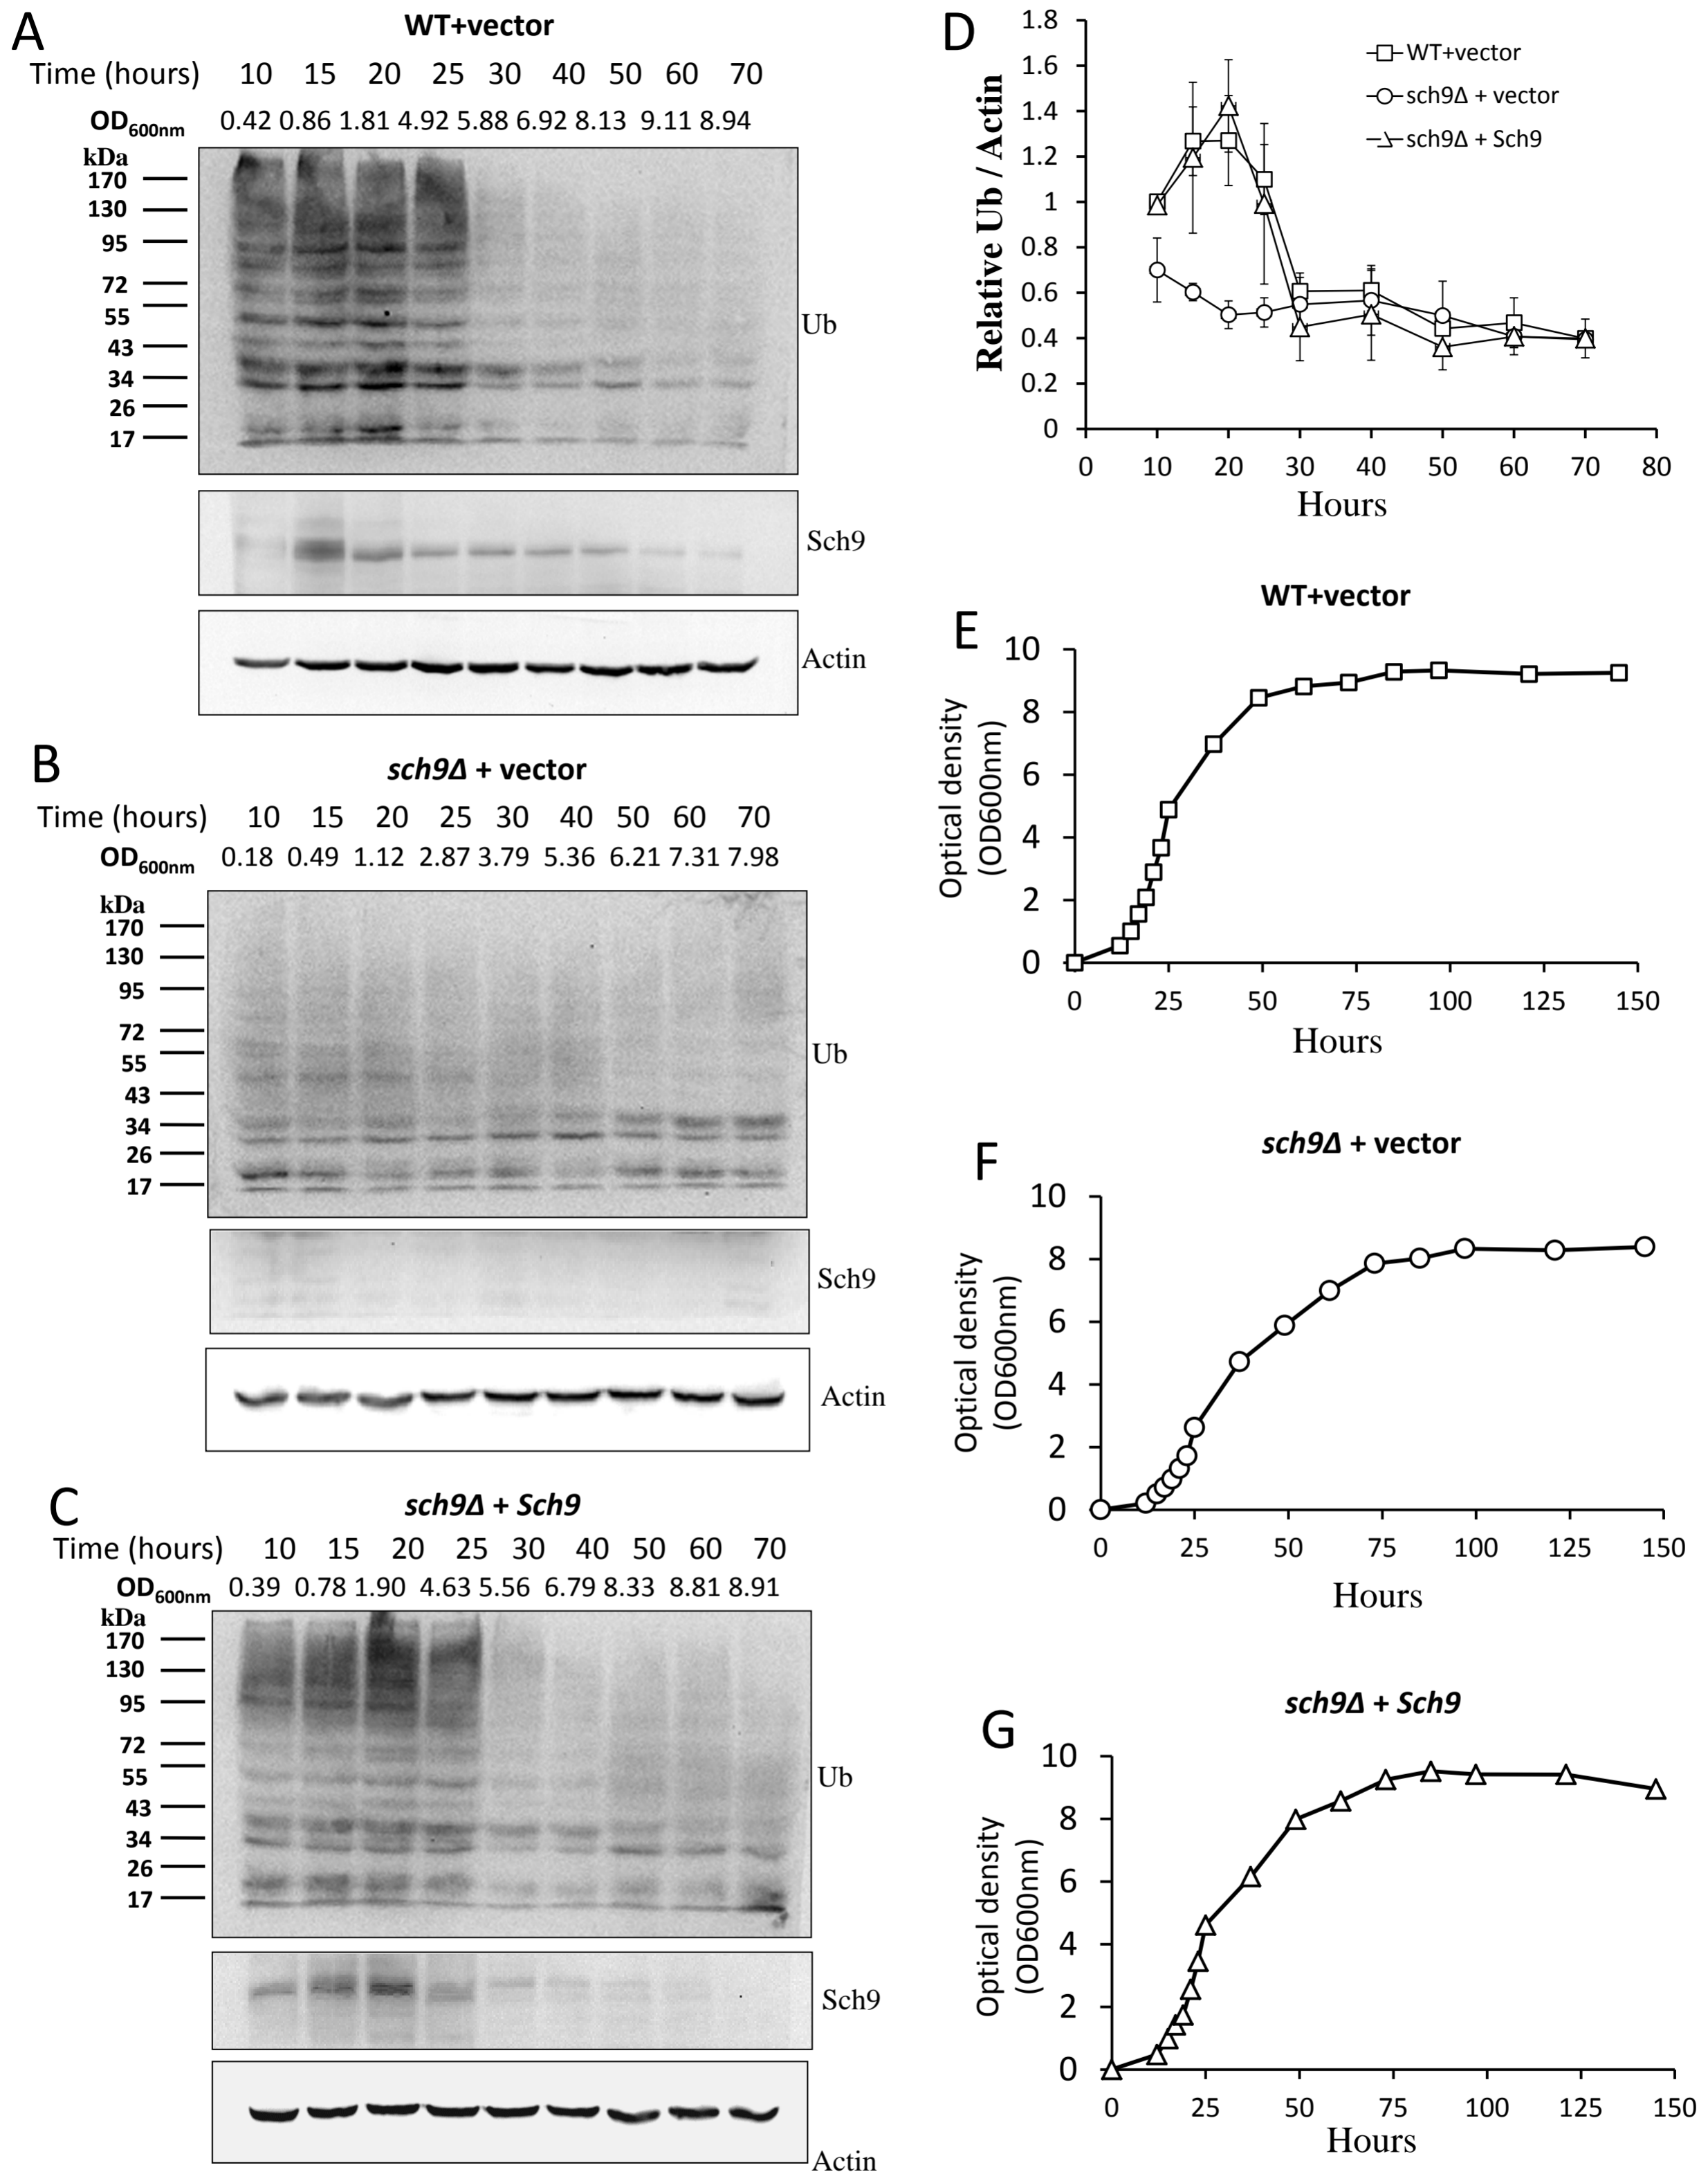

Figure S1. Protein ubiquitination and growth characters of WT (TB50a) and *sch9Δ* (TS120-2d) cells transformed with *pRS416-SCH9* or empty vector were monitored in SDC. (A-C) The levels of ubiquitinated proteins of indicated strains at indicated times after inoculation were tested by western blotting with actin as the loading control. The expression of Sch9 was also detected. Their OD<sub>600nm</sub> was recorded at indicated time. Gels were blot on to a single PVDF membrane for comparisons between gels. (D) The quantifications of three repeats from panel A to C. (E-G) Growth curves of indicated strains.

Figure S2

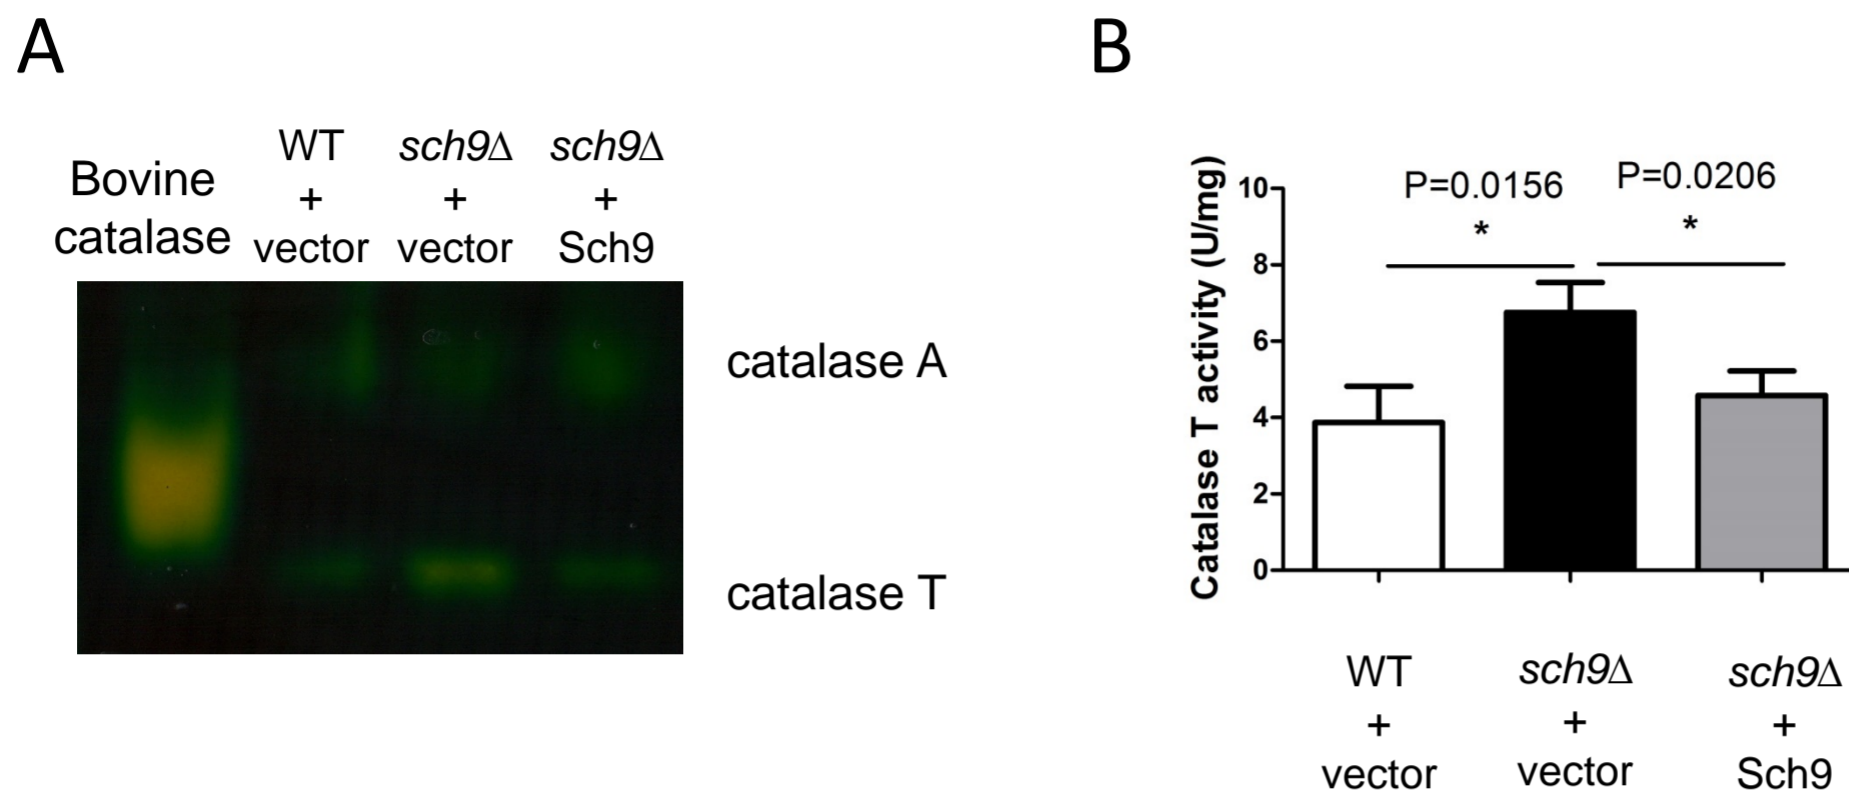

Figure S2. Catalase activities in WT (TB50a) and *sch9Δ* (TS120-2d) cells transformed with *pRS416-SCH9* or empty vector were analyzed by native gel electrophoresis (A) followed by the quantification (B). 10 U of bovine catalase was loaded as control.

Figure S3

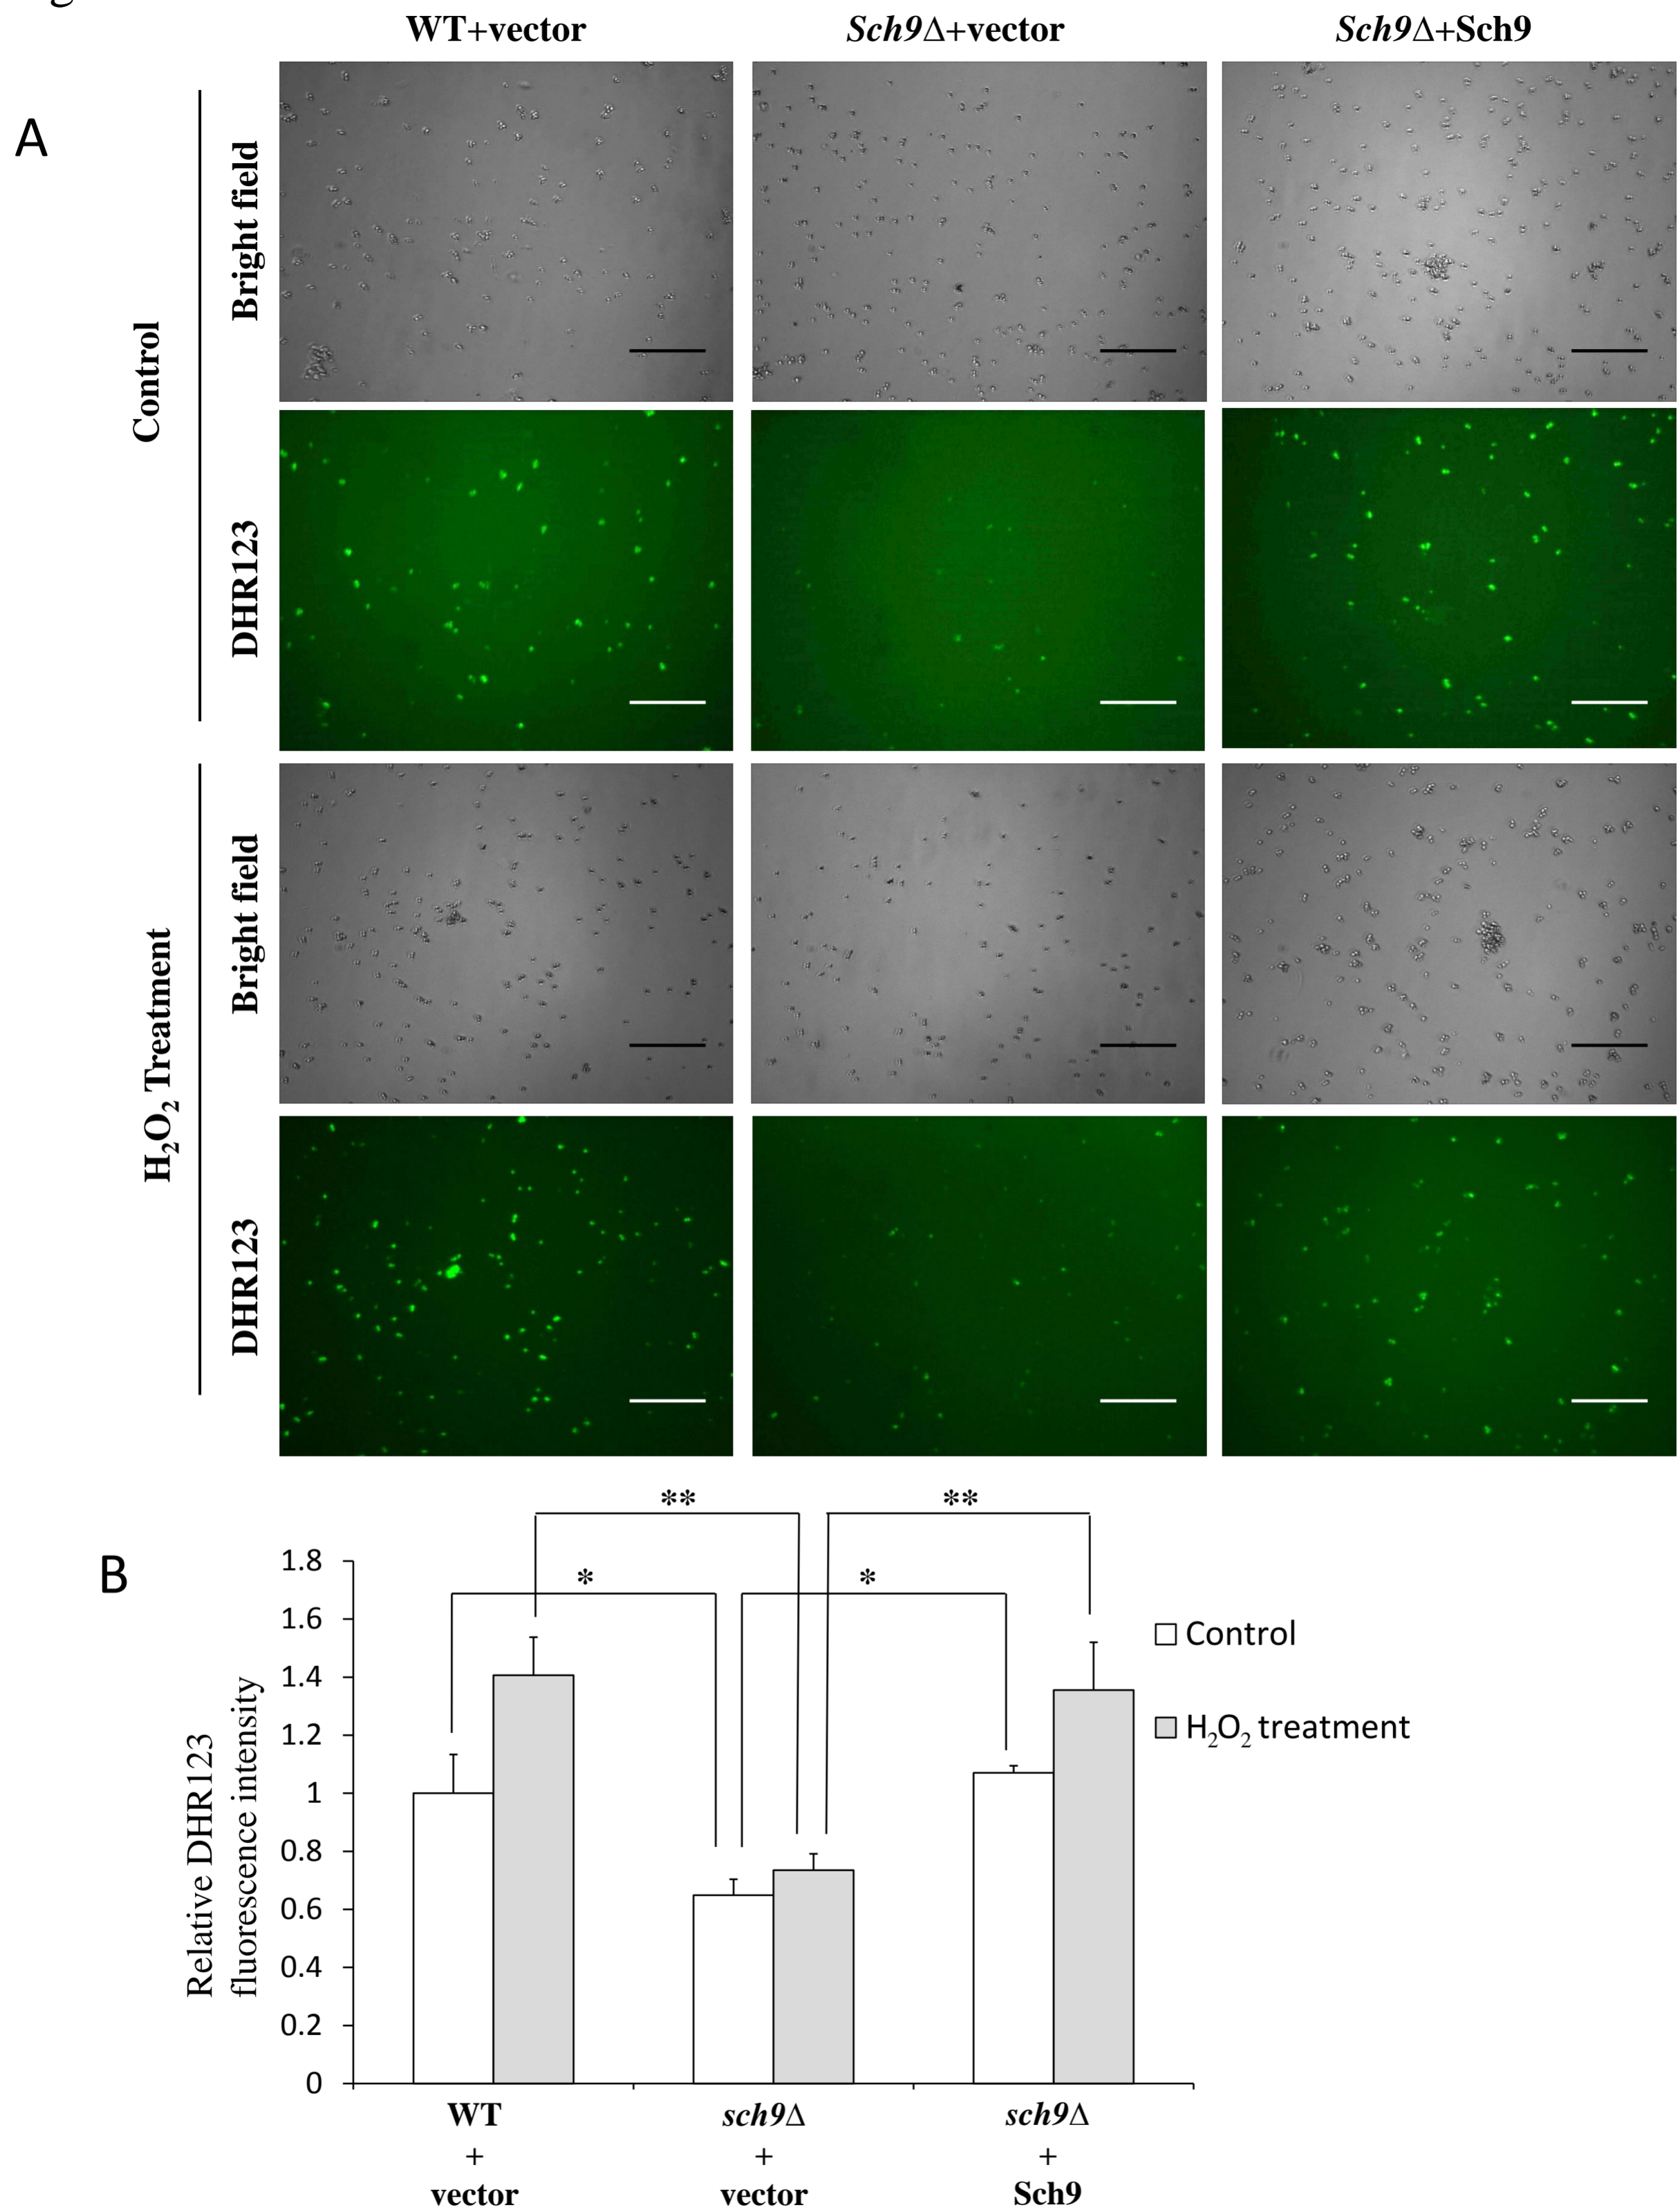

Figure S3. Analysis of intracellular oxidation by DHR123 staining. (A) Microscopy of DHR123 fluorescence on WT (TB50a) cells in log phase transformed with empty vector (WT+vector) and *sch9* $\Delta$  (TS120-2d) cells in log phase transformed with empty vector (*sch9* $\Delta$ +vector) or pRS416-SCH9 (*sch9* $\Delta$ +Sch9) with or without 1 hour treatment of 0.5mM H<sub>2</sub>O<sub>2</sub>. Bars: 100  $\mu$ m. (B) Spectrofluorometer analysis of DHR123-stained cells. (\* P < 0.05, \*\* P < 0.01)

Figure S4

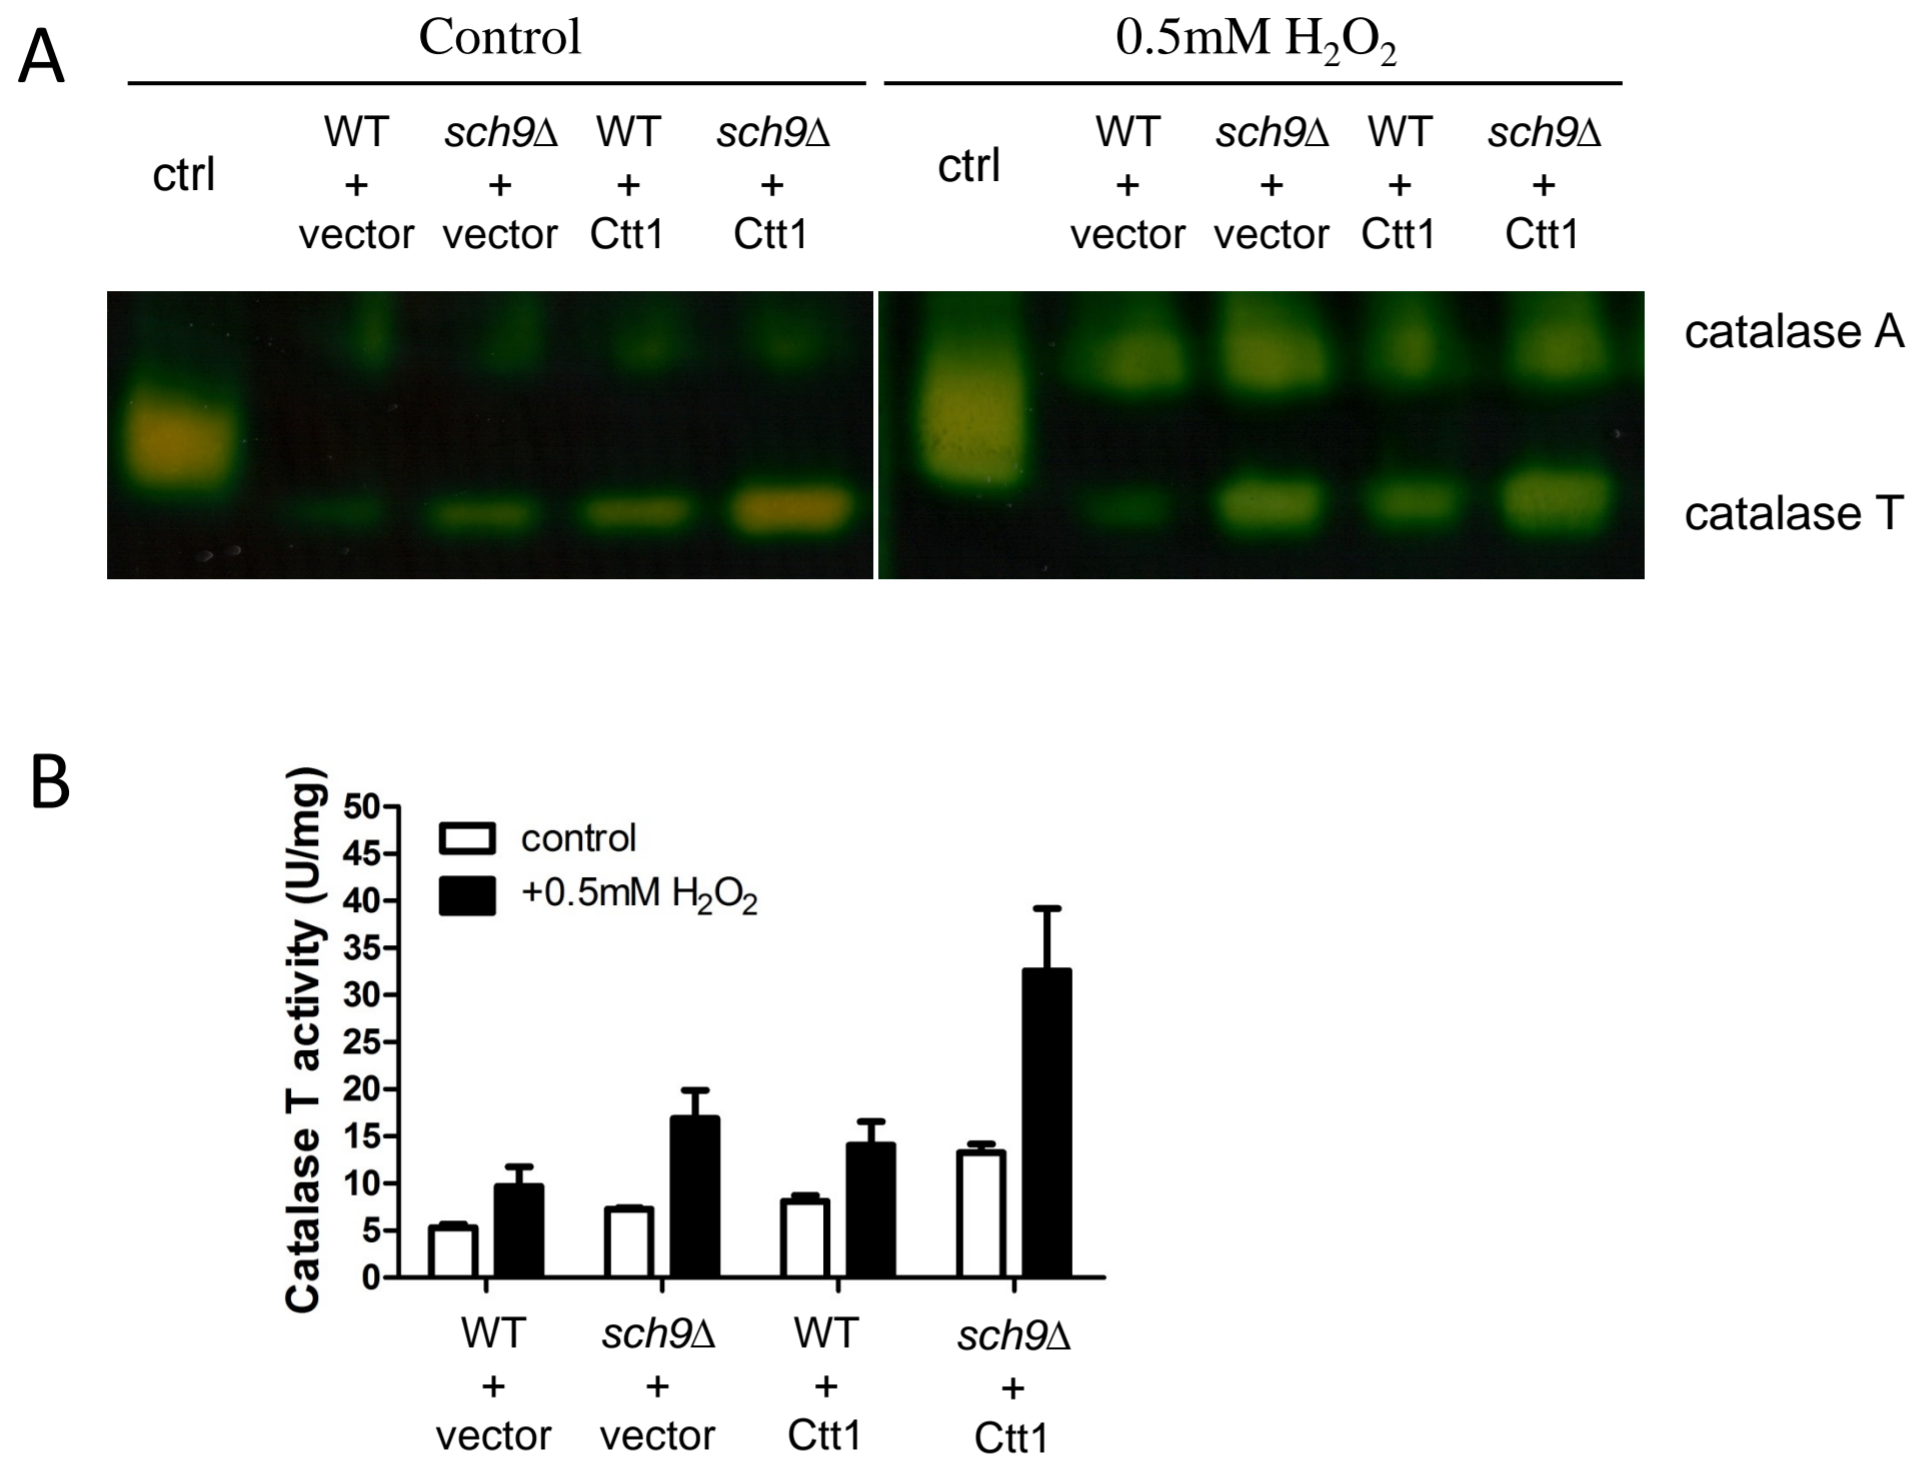

Figure S4. Enhancing catalase activity by the overexpression of Ctt1. (A) Catalase activities were detected by native gel electrophoresis on WT (TB50a) and *sch9Δ* (TS120-2d) cells in log phase transformed with pEGH-*CTT1* or control vector with or without 1 hour treatment of 0.5mM H<sub>2</sub>O<sub>2</sub>. 10 U of bovine catalase was loaded as control. (B) Quantification of native gel electrophoresis results.

Figure S5

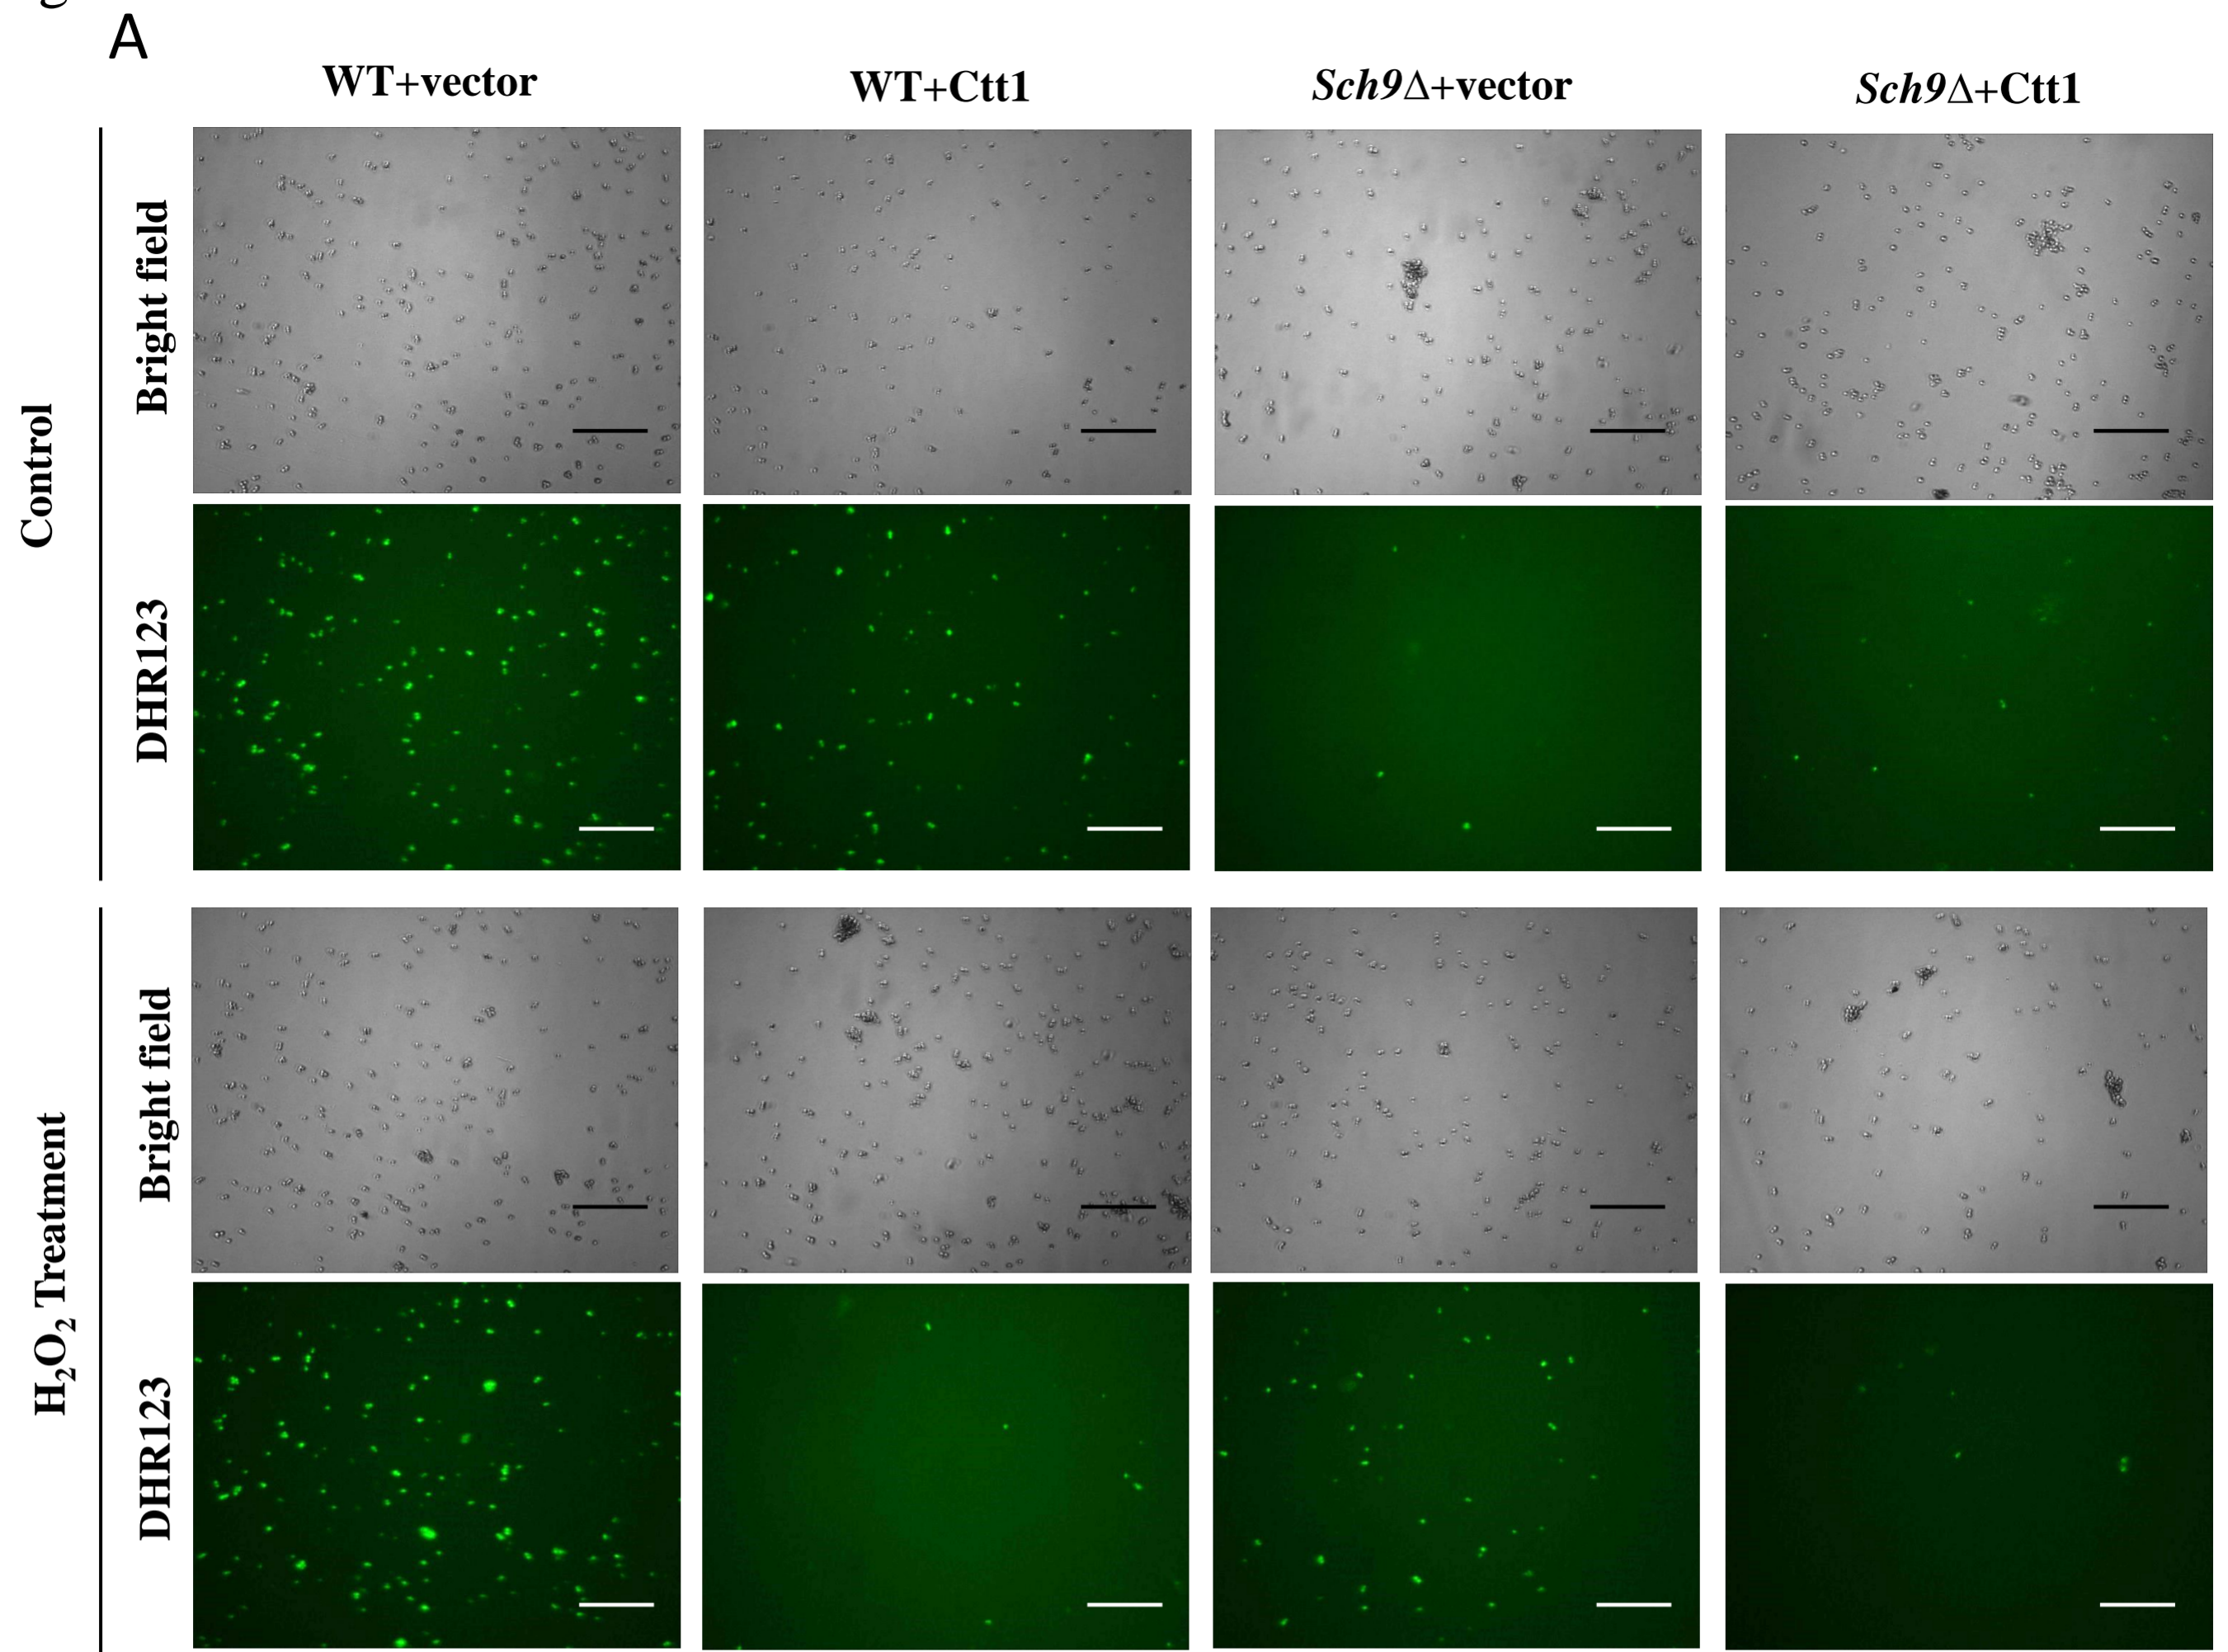

**B**

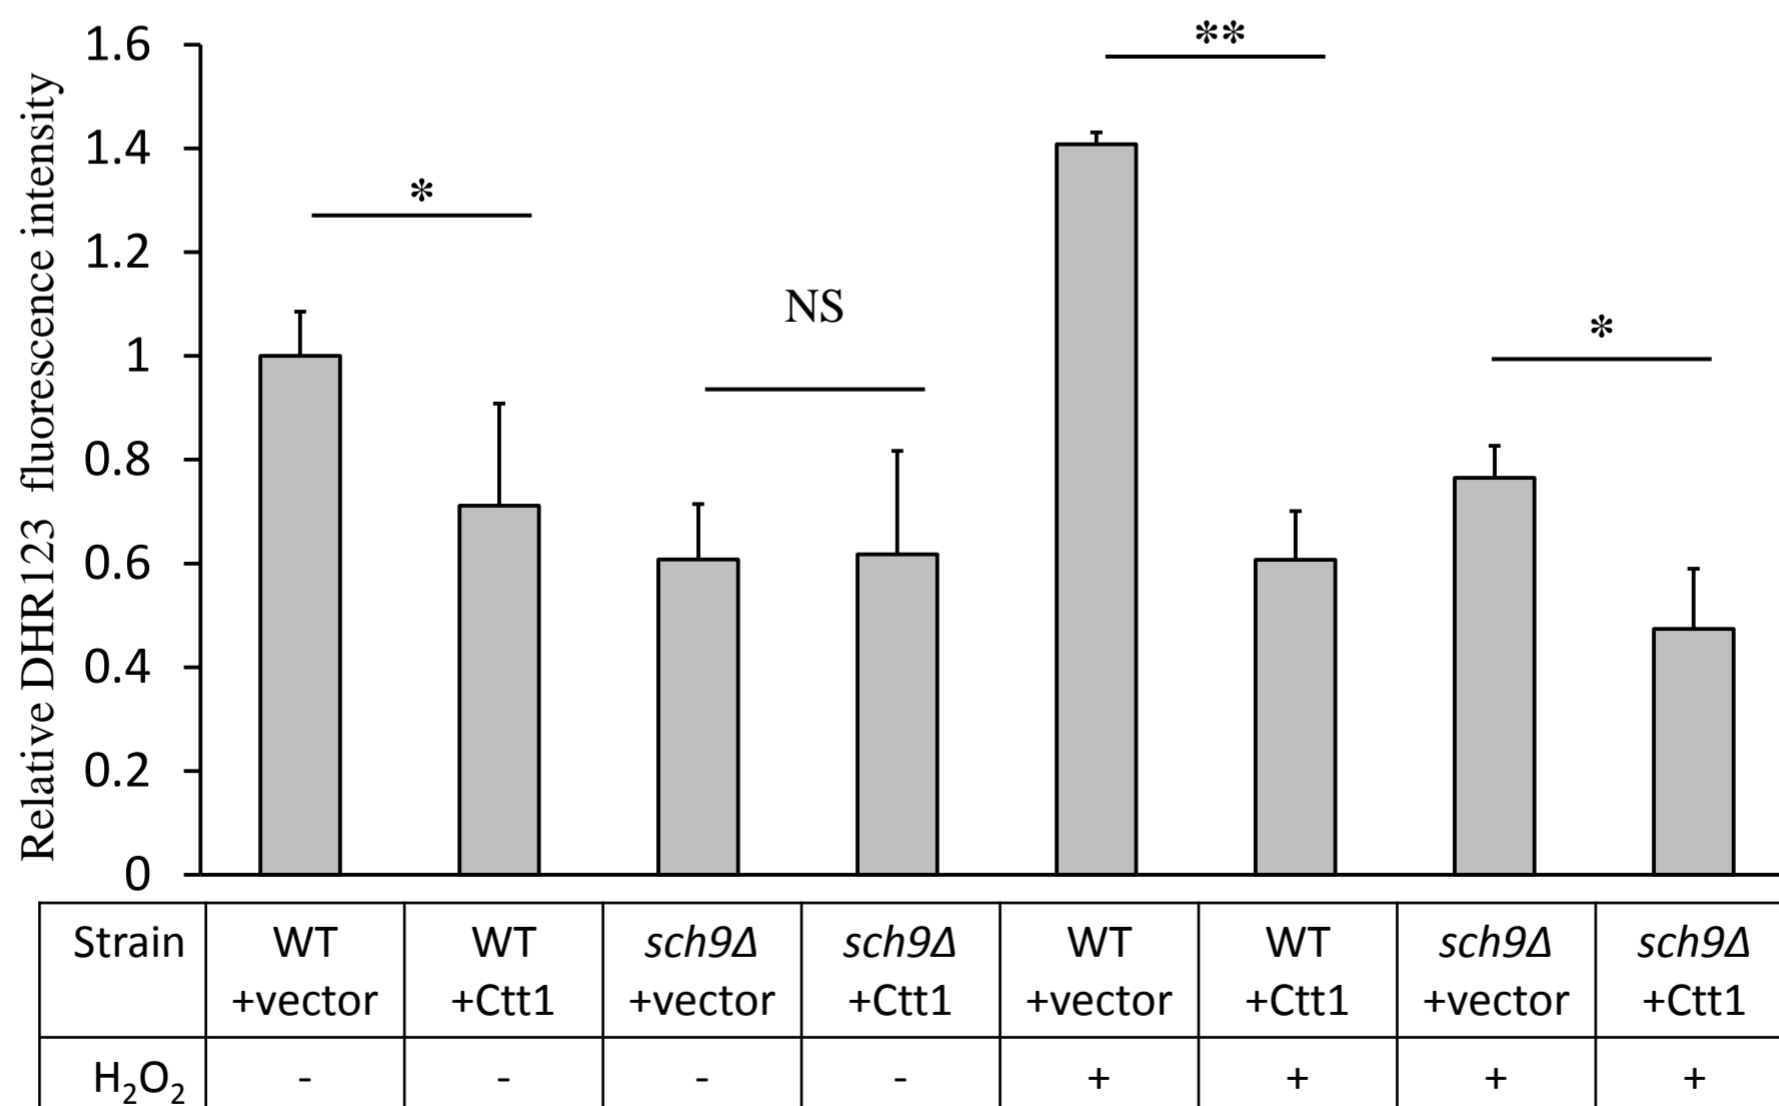

Figure S5. DHR123 staining analysis of intracellular oxidation on cells with or without Ctt1 overexpression. (A) Microscopy of DHR123 fluorescence on WT (TB50a) and *sch9*Δ (TS120-2d) cells in log phase transformed with pEGH-*CTT1* or control vector with or without 1 hour treatment of 0.5mM H<sub>2</sub>O<sub>2</sub>. Bars: 100 μm. (B) Spectrofluorometer analysis of DHR123-stained cells. (\* P < 0.05, \*\*p < 0.01, "ns" no significance)
